# Supplementary material for: Consumption of Olive Oil and Diet Quality and Risk of Dementia-Related Death
Source: PubMed Central journal article supplement (PMC11074805; doi:10.1001/jamanetworkopen.2024.10021), 2024-05-06
Supplement: jamanetwopen-e2410021-s002.pdf [file jamanetwopen-e2410021-s002.pdf]

## Data Sharing Statement

Tessier. Consumption of Olive Oil and Diet Quality and Risk of Dementia-Related Death. *JAMA Netw Open*. Published May 06, 2024. doi:10.1001/jamanetworkopen.2024.10021

### Data

**Data available:** No

### Additional Information

**Explanation for why data not available:** Data described in the manuscript will not be made publicly available; however, analytic code will be made available at <https://github.com/DrTessier>. Further information including the procedures for obtaining and accessing data from the Nurses' Health Studies and Health Professionals' Follow-up Study is described at <https://www.nurseshealthstudy.org/researchers> (email: [nhsaccess@channing.harvard.edu](mailto:nhsaccess@channing.harvard.edu)) and <https://sites.sph.harvard.edu/hpfs/for-collaborators>.
